# Supplementary material
Source: PubMed Central journal article supplement (PMC3024800)
Supplement: supp_M110.144089_jbc.M110.144089-1.pdf [file supp_M110.144089_jbc.M110.144089-1.pdf]

## Supplementary files:

### **Supp. Table 1:**

Backbone NMR chemical shifts assignment ( $C_{\alpha}$ ,  $C'$ ,  $H_{\alpha}$ , N) of the  $\alpha$ Tub410C peptide in 20 mM MES-KOH, pH 6.9 at  $T=20^{\circ}\text{C}$ .

### **Supp. Figure 1:**

A. Fractions from Ni-NTA affinity chromatography were analyzed by 15% SDS/PAGE and detected by Coomassie blue staining. Fractions analyzed on lane 2 and lane 3 were combined and concentrated by ultrafiltration.

B. Expression and purification of hTau40. Lane1: before induction. Lane2: after induction. Lane 3: after boiling and centrifugation.

C. Left: NOESY- $^1\text{H}$ - $^{15}\text{N}$ -HSQC NMR spectrum (zoomed) of the  $\alpha$ Tub410C (400  $\mu\text{M}$ ) in 20 mM MES-KOH, pH 6.9 at  $T=20^{\circ}\text{C}$ . The zoomed region shows the spin system of Y451. Right: Zoom of a NOESY- $^1\text{H}$ - $^{15}\text{N}$ -HSQC NMR spectrum of the  $\alpha$ Tub410C (400  $\mu\text{M}$ ) in the presence of 3 mM spermine in 20 mM MES-KOH, pH 6.9 at  $T=20^{\circ}\text{C}$ . The arrow points out the Y451/spermine intermolecular nOe.

### **Supp. Figure 2:**

Superimposition of  $^1\text{H}$ - $^{15}\text{N}$ -HSQC NMR spectrum of 400  $\mu\text{M}$   $\alpha$ Tub410C peptide in 20 mM MES-KOH, pH 6.9 at  $T=20^{\circ}\text{C}$  without (red) or with 10 mM putrescine (black).

### **Supp. Figure 3:**

A. High concentration of spermine do not cause aggregation of Tau. 100  $\mu\text{M}$   $^{15}\text{N}$ - $\alpha$ Tub410C, 40  $\mu\text{M}$  Tau and 9 mM spermine were mixed in 20 mM MES-KOH, pH 6.9, 1 mM DTT at  $20^{\circ}\text{C}$ . After 2 hours at  $20^{\circ}\text{C}$ , the sample was centrifuged (20 000 x g, 20 min). Pellet, was resuspended in a volume of 1X SDS/PAGE buffer equivalent to the initial sample volume. Equivalent volumes of supernatant and pellet were analyzed by 12% SDS/PAGE.

B. 1D  $^1\text{H}$  NMR spectrum (zoomed) on the 1.4-1.6 ppm region obtained with 20 mM MES-KOH, pH 6.9, 20 % Glycerol, 40  $\mu\text{M}$  tubulin at  $T=20^{\circ}\text{C}$  in the presence of 300  $\mu\text{M}$  spermine and 2 mM  $\text{MgCl}_2$  (green) or 3 mM  $\text{MgCl}_2$  (red) or 7 mM  $\text{MgCl}_2$  (blue). Intensities of the spectra were calibrated with an external reference. The spectrum obtained in similar conditions with 5 mM calcium is displayed for comparison (purple).

### **Supp. Figure 4:**

A. Human GFP- $\alpha$ -Tubulin, GFP- $\alpha$ -Tubulin $\Delta$ 13C and GFP- $\alpha$ -Tubulin $\Delta$ 23C were transfected in HeLa cells (x 60). 24 h post-transfection, 0.5  $\mu\text{M}$  taxol was added during 1 h when indicated in the figure. Cells were fixed and labeled with anti-tubulin antibodies.

B. Higher magnification of previous images.

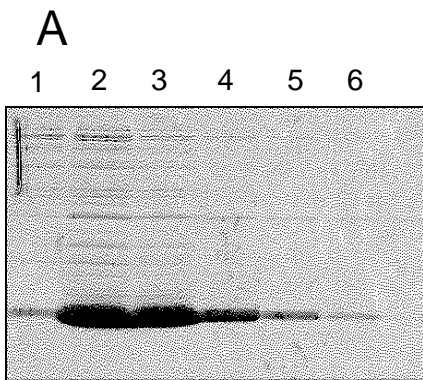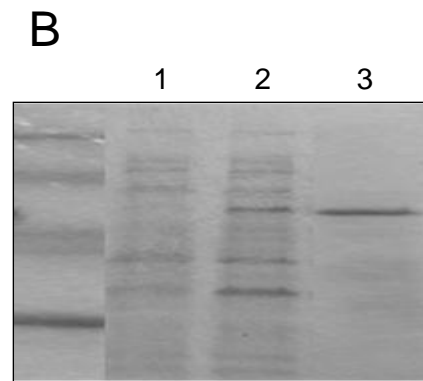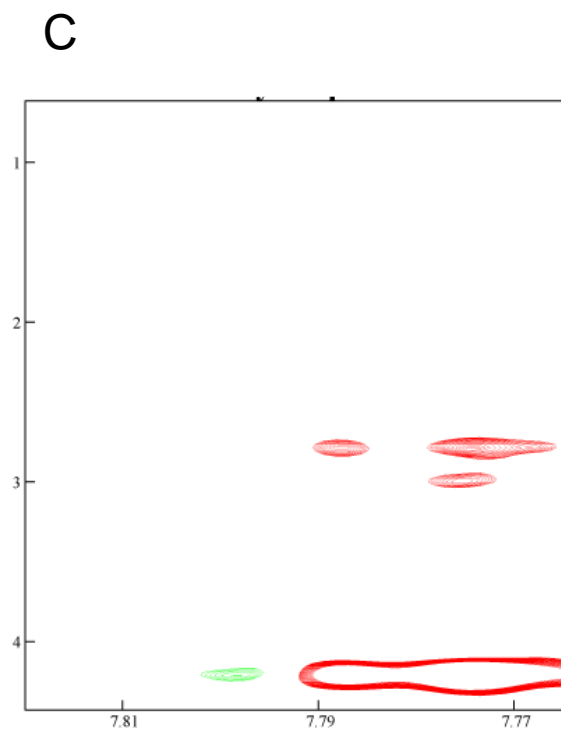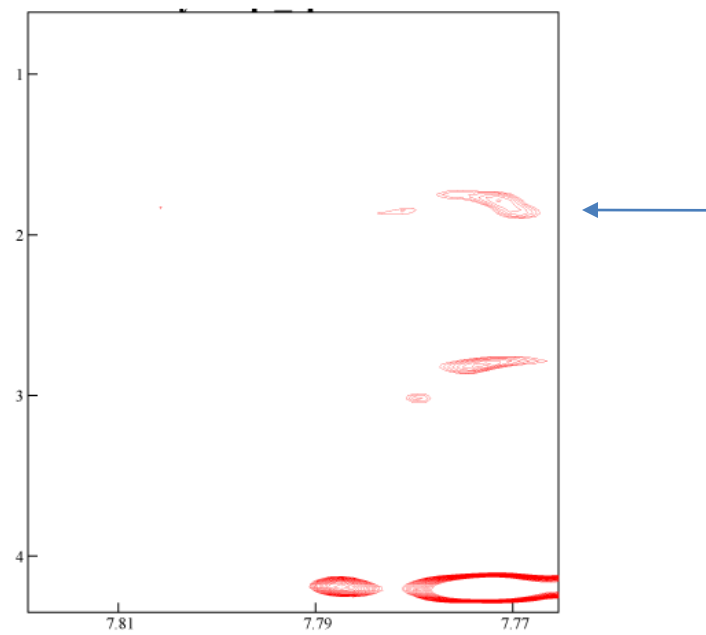

Figure S1

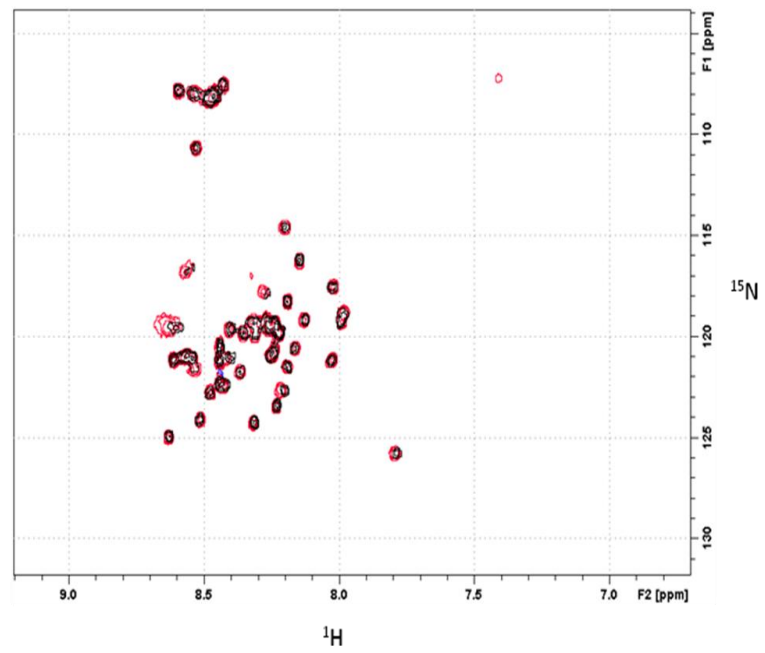

Figure S2

**A**

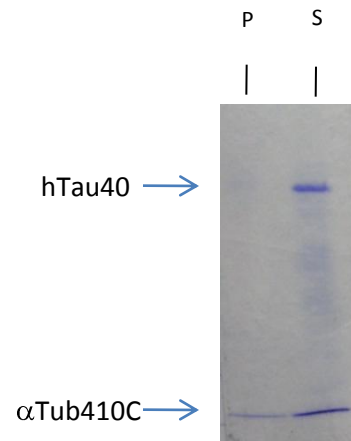

**B**

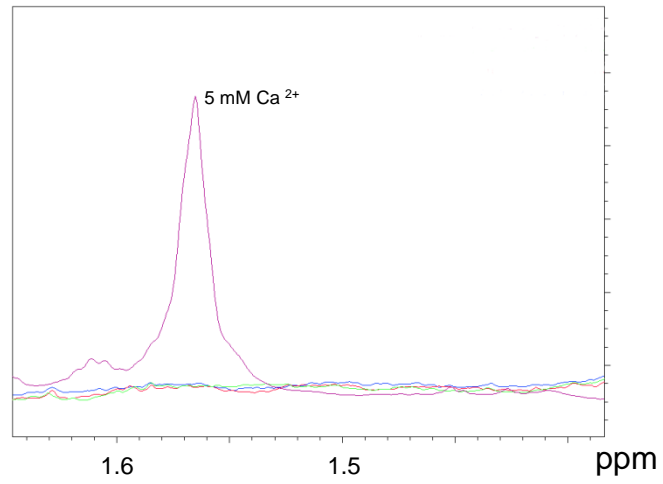

Figure S3

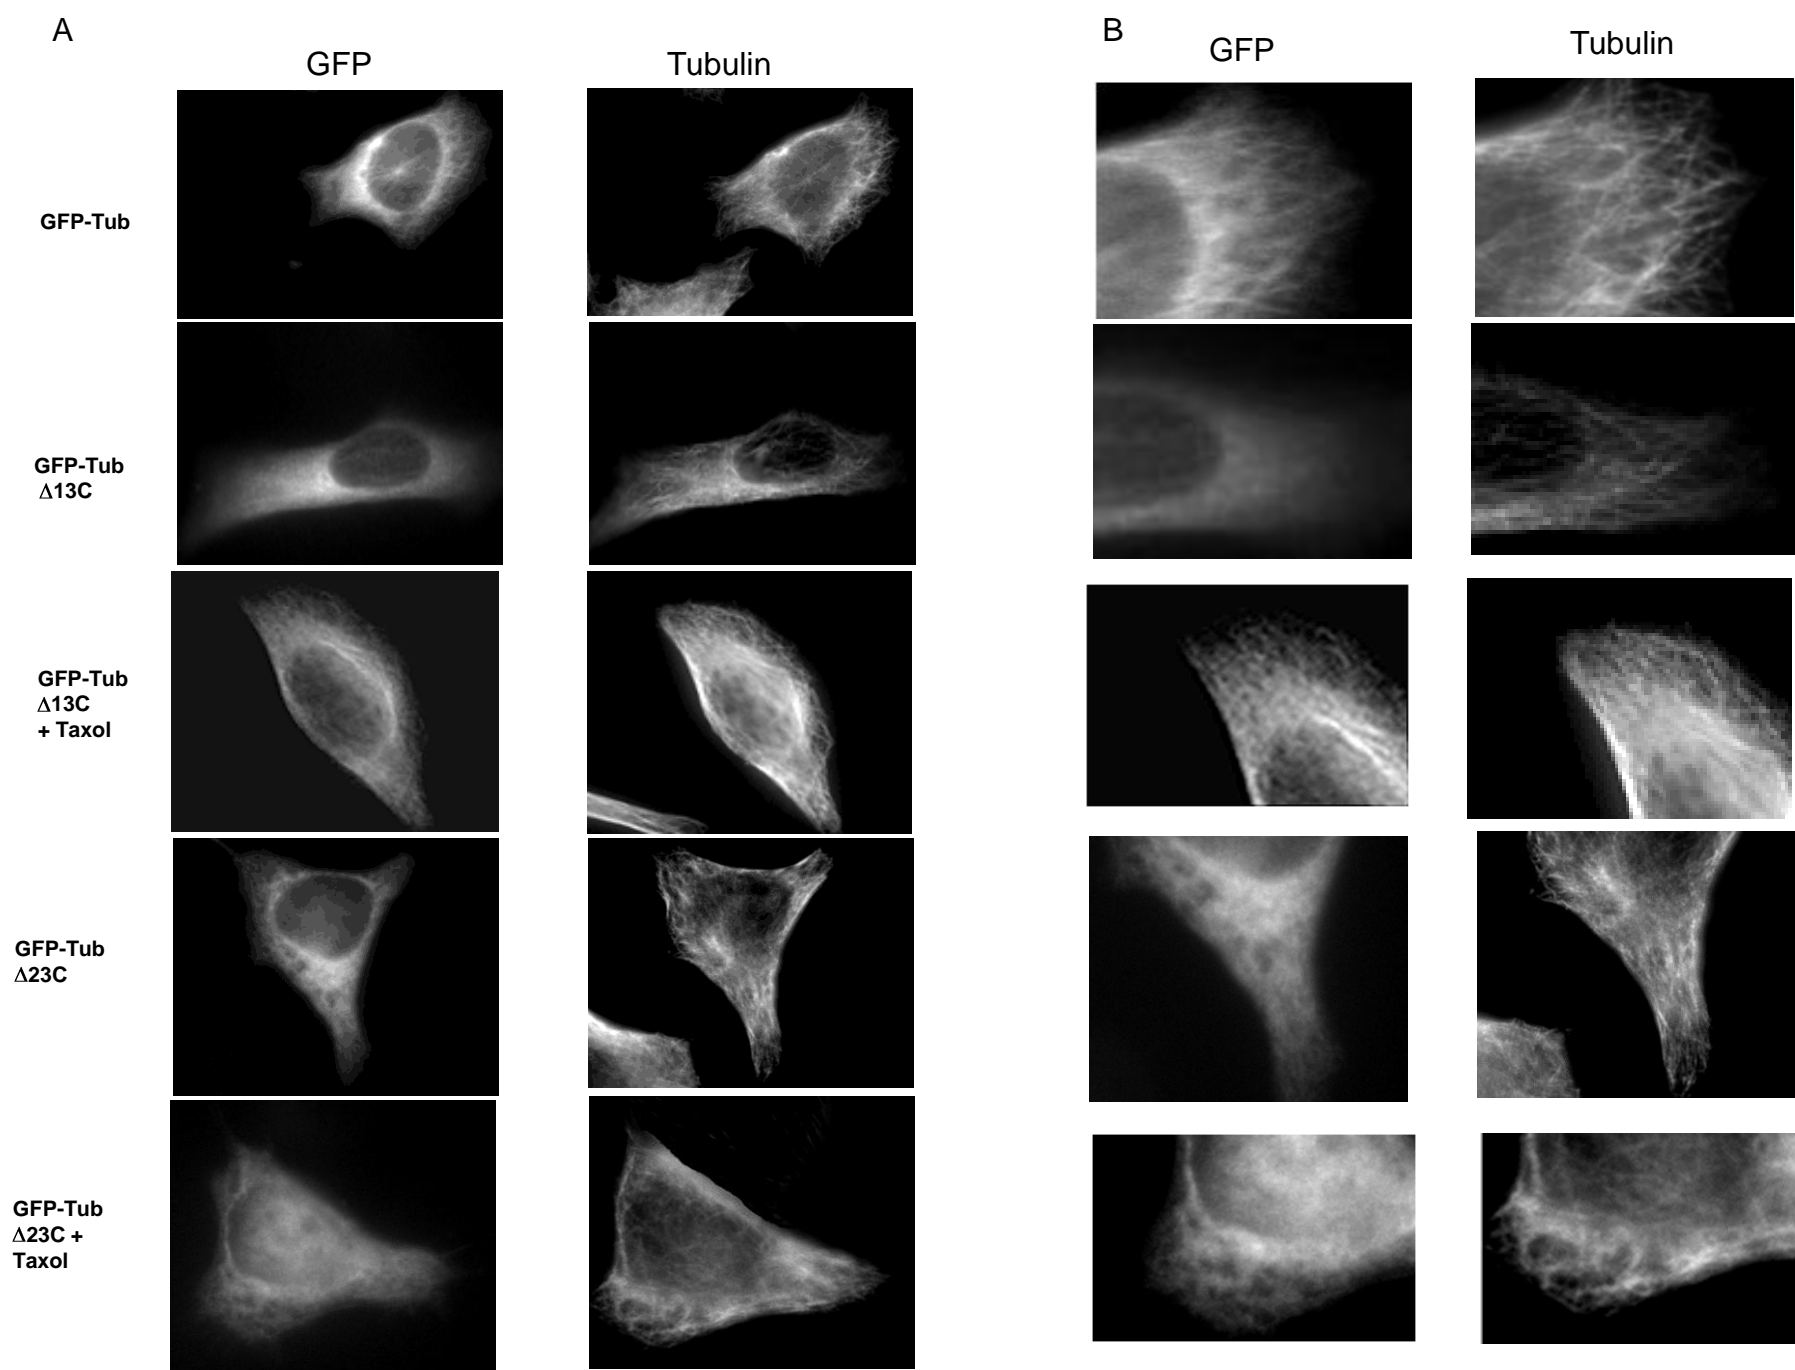

Figure S4
